# Supplementary material for: Effects of different functional groups on metastatic behavior of SPC-A-1/human lung cancer cells in self-assembled monolayers
Source: Royal Society of Chemistry journal article supplement (doi:10.1039/c4ra16554c), 2015-01-01
Supplement: c4ra16554c1.pdf [file c4ra16554c1.pdf]

Supporting information:

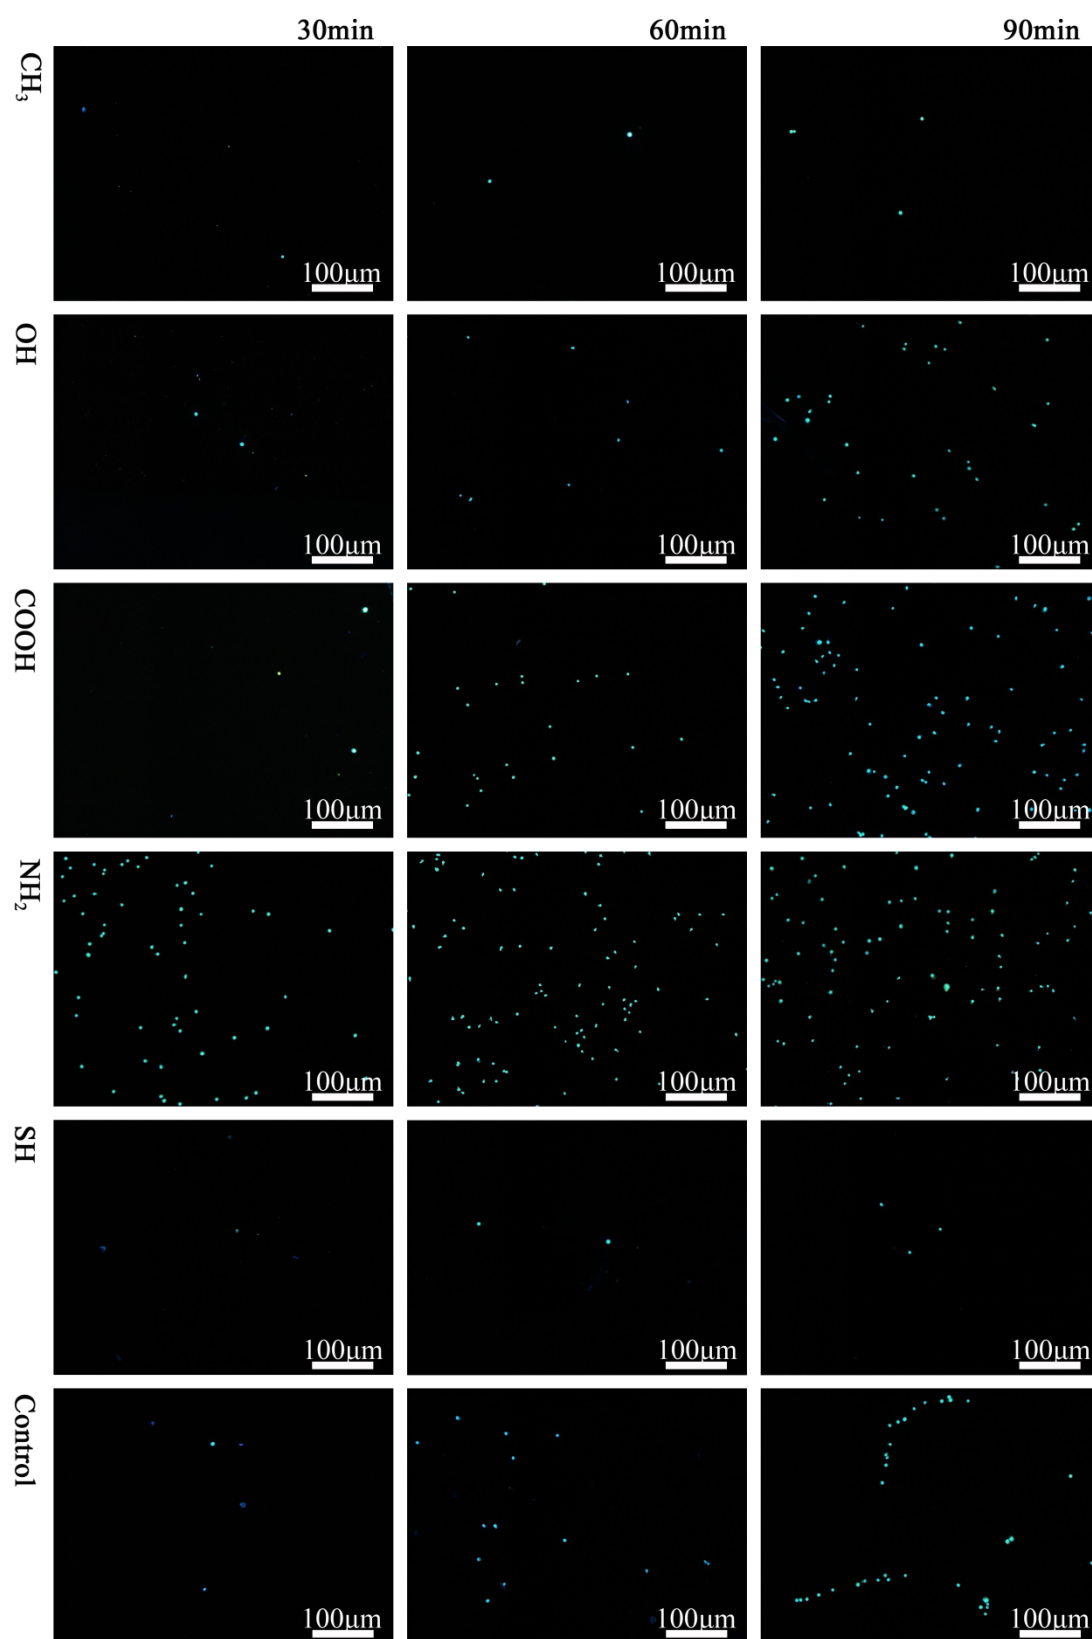

**Fig. S1.** SPC-A-1 cells on SAM-modified surfaces measured by counting cells stained with DAPI using a fluorescence microscope after 30, 60 and 90 min of incubation. The images were taken at  $\times 100$ .

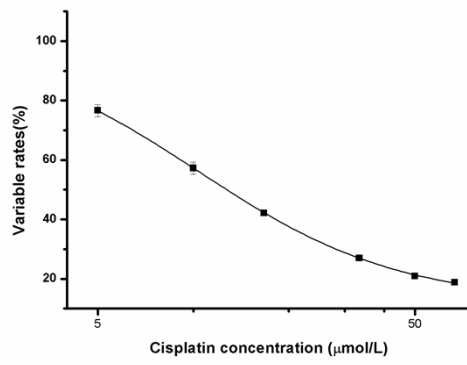

**Fig. S2.** Viable rates of SPC-A-1 cells treated by different concentrations of cisplatin for 24h. And the IC<sub>50</sub> value is 10.37 μmol/L.

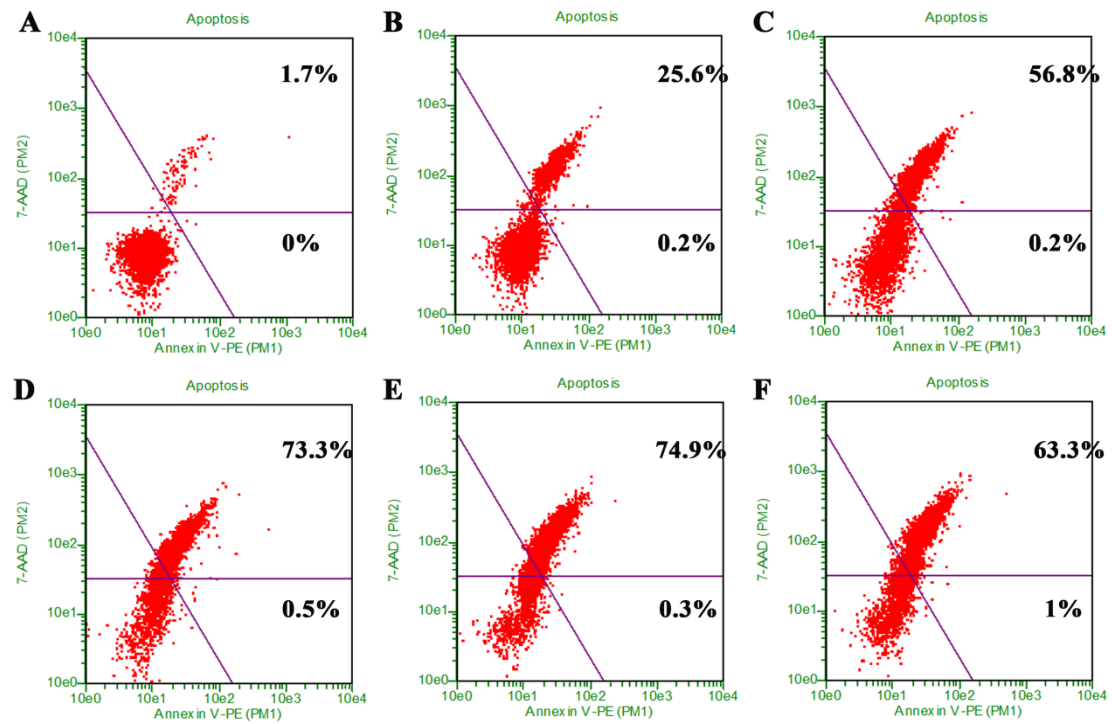

**Fig. S3.** The apoptosis rates of SPC-A-1 cells treated by cisplatin of different concentrations for 24h. The concentration from A to F

represented 0μmol/L, 10μmol/L, 16.7μmol/L, 33.4μmol/L, 66.8μmol/L, 250μmol/L, respectively.
